# Supplementary material for: Discriminant analysis of principal components and pedigree assessment of genetic diversity and population structure in a tetraploid potato panel using SNPs
Source: PubMed Central journal article supplement (PMC5856401; doi:10.1371/journal.pone.0194398), 2018-03-16
Supplement: pone.0194398.s001.pdf [file pone.0194398.s001.pdf]

Value of BIC  
versus number of clusters

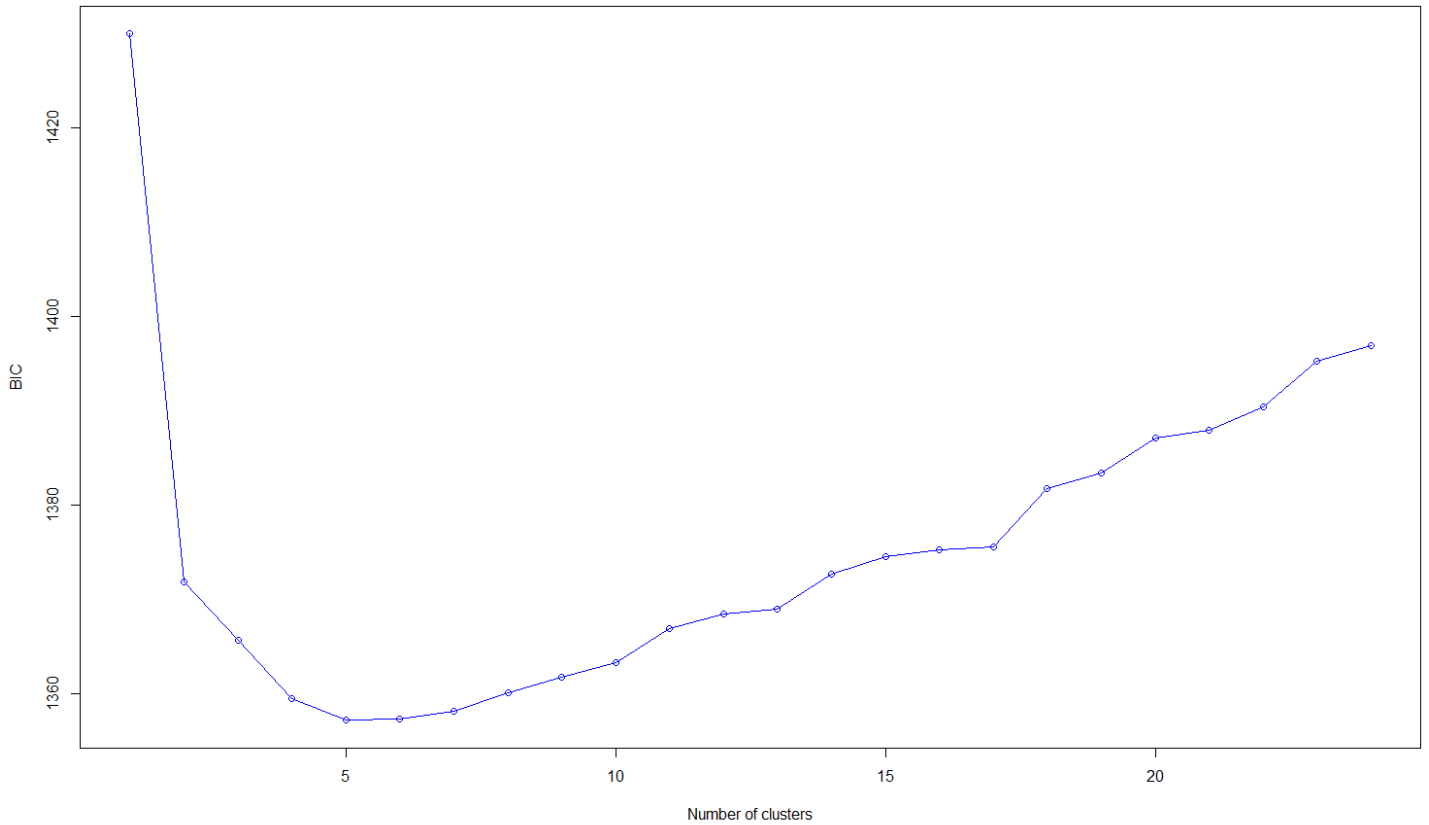

DAPC Cross-Validation

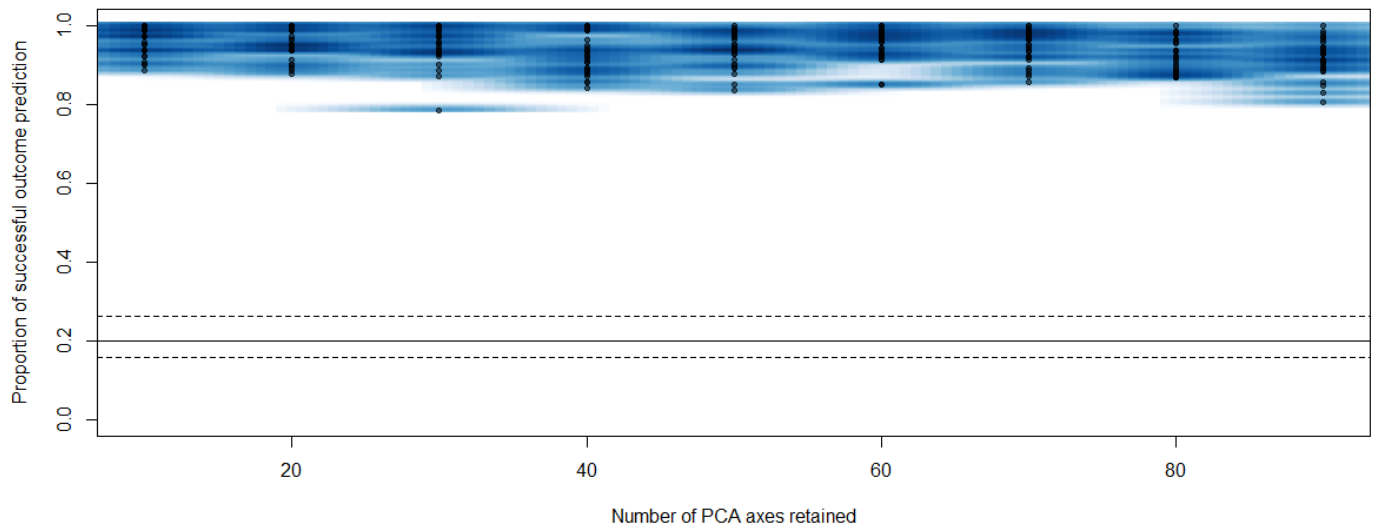

S3 Fig. (A) Graph of number of clusters vs. BIC. In the x axis is represented the different number of clusters that could be presented in the population. In the y axis, is represented the BIC value associated with each number of clusters. (B) Graph of cross-validation of DAPC. In the x axis is represented the number of PC retained in each DAPC. In the y axis, is represented the proportion of successful outcome prediction. Each dot represents the individual replicate of the analysis
