# Supplementary material for: Discriminant analysis of principal components and pedigree assessment of genetic diversity and population structure in a tetraploid potato panel using SNPs
Source: PubMed Central journal article supplement (PMC5856401; doi:10.1371/journal.pone.0194398), 2018-03-16
Supplement: pone.0194398.s002.pdf [file pone.0194398.s002.pdf]

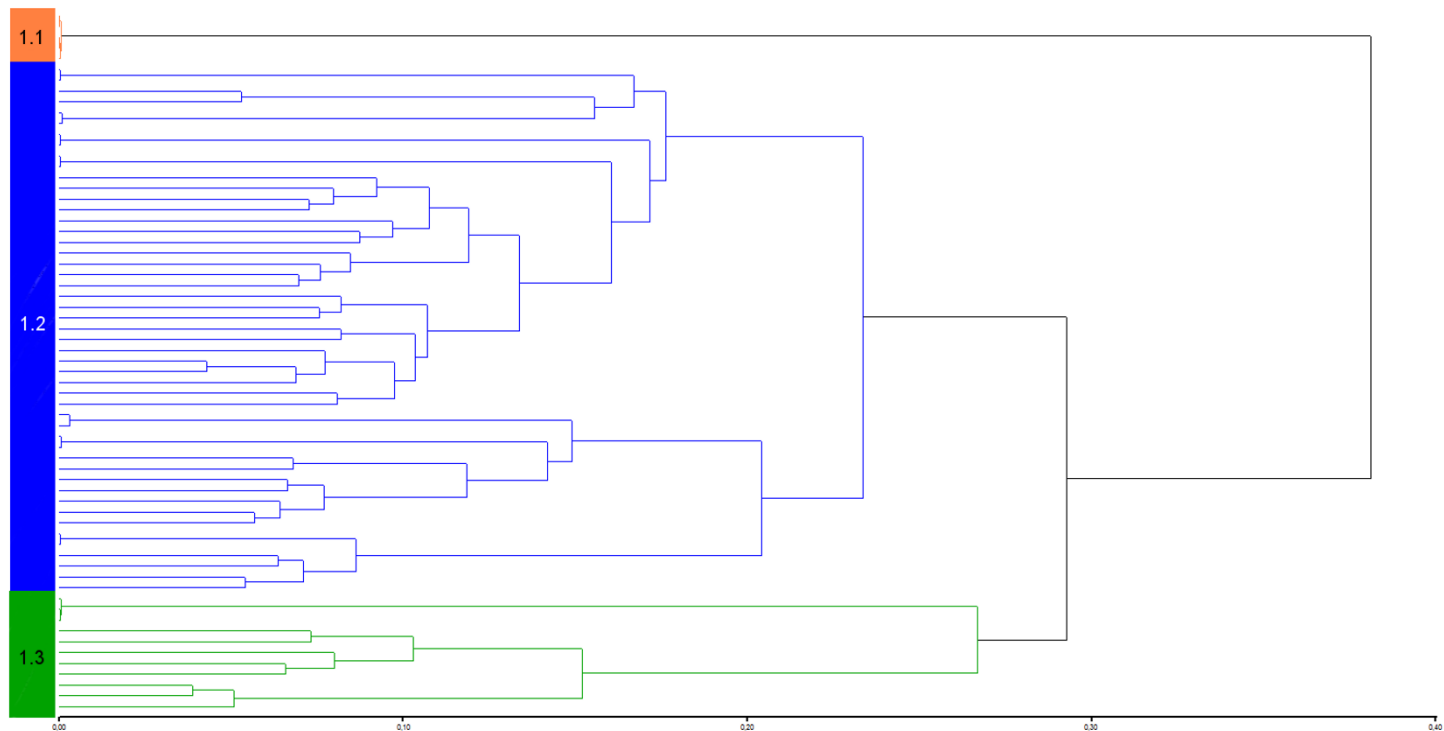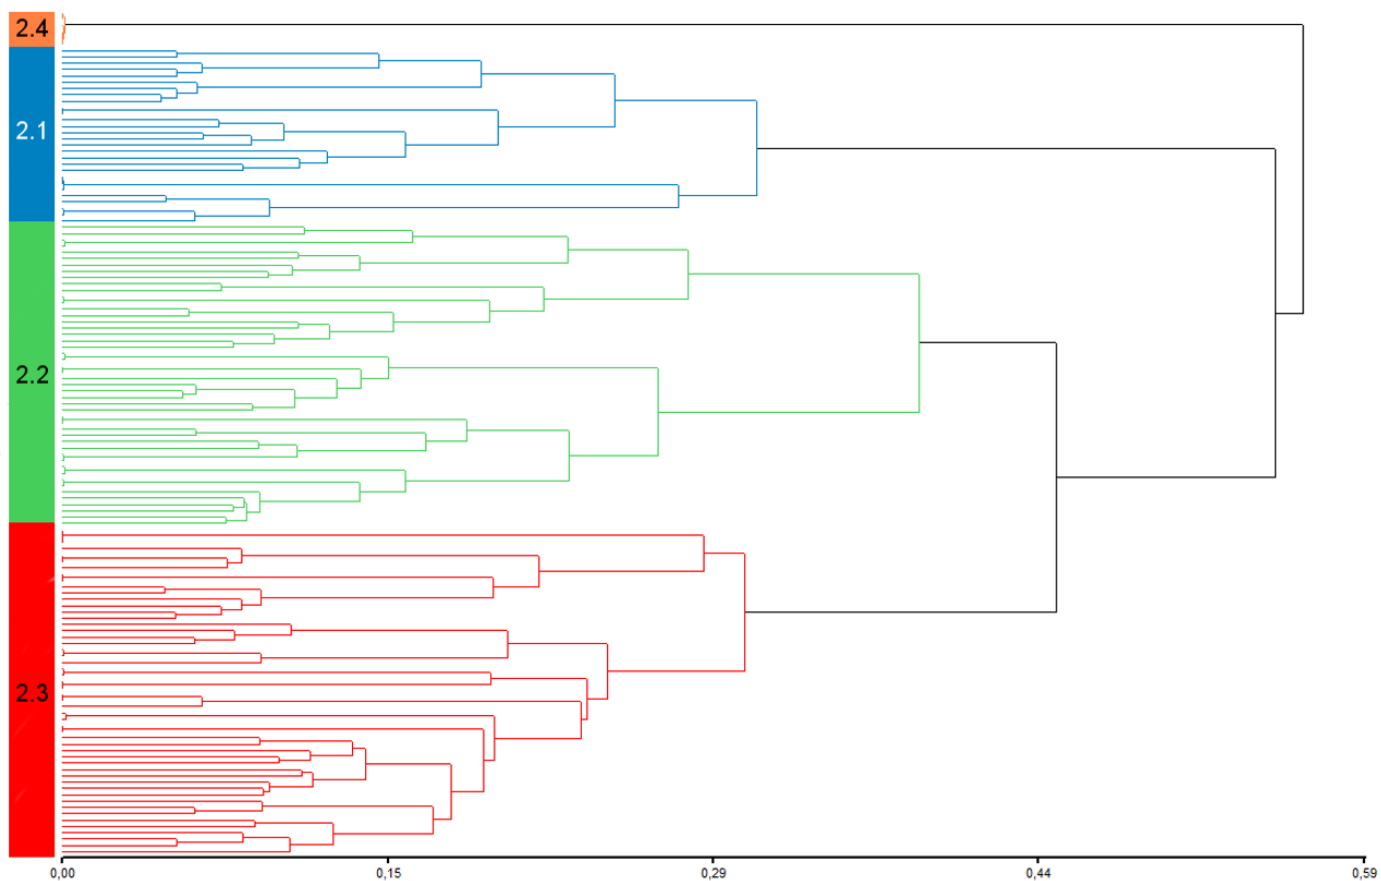

S5 Fig. A) Dendrogram from Nei genetic distance matrix for subpopulation 1. B) Dendrogram from Nei genetic distance matrix for subpopulation 2. In the X axis are represented the genetic distances between groups and individuals. In the Y axis are represented the subpopulations in which each population/subpopulation was divided
