# Supplementary material for: Discriminant analysis of principal components and pedigree assessment of genetic diversity and population structure in a tetraploid potato panel using SNPs
Source: PubMed Central journal article supplement (PMC5856401; doi:10.1371/journal.pone.0194398), 2018-03-16
Supplement: pone.0194398.s003.pdf [file pone.0194398.s003.pdf]

S1 Table. Genotypes that composed the potato panel

| Genotype   | Origin    | Species                                                                      | Ploidy |
|------------|-----------|------------------------------------------------------------------------------|--------|
| 21mat      | Argentina | <i>Solanum Tuberosum</i> Gp. <i>Tuberosum</i> x<br><i>Solanum gourlayii</i>  | 4x     |
| 29mat      | Argentina | <i>Solanum gourlayii</i> x <i>Solanum<br/>Tuberosum</i> Gp. <i>Tuberosum</i> | 4x     |
| 304013.11  | Peru      | <i>Solanum Tuberosum</i> Gp. <i>Tuberosum</i>                                | 4x     |
| 304013.18  | Peru      | <i>Solanum Tuberosum</i> Gp. <i>Tuberosum</i>                                | 4x     |
| 304056.4   | Peru      | <i>Solanum Tuberosum</i> Gp. <i>Tuberosum</i>                                | 4x     |
| 304072.6LB | Peru      | <i>Solanum Tuberosum</i> Gp. <i>Tuberosum</i>                                | 4x     |
| 304079.9   | Peru      | <i>Solanum Tuberosum</i> Gp. <i>Tuberosum</i>                                | 4x     |
| 304081.2   | Peru      | <i>Solanum Tuberosum</i> Gp. <i>Tuberosum</i>                                | 4x     |
| 304085.1   | Peru      | <i>Solanum Tuberosum</i> Gp. <i>Tuberosum</i>                                | 4x     |
| 304092.1   | Peru      | <i>Solanum Tuberosum</i> Gp. <i>Tuberosum</i>                                | 4x     |
| 304141.4   | Peru      | <i>Solanum Tuberosum</i> Gp. <i>Tuberosum</i>                                | 4x     |
| 304146.1   | Peru      | <i>Solanum Tuberosum</i> Gp. <i>Tuberosum</i>                                | 4x     |
| 304149.15  | Peru      | <i>Solanum Tuberosum</i> Gp. <i>Tuberosum</i>                                | 4x     |
| 304150.11  | Peru      | <i>Solanum Tuberosum</i> Gp. <i>Tuberosum</i>                                | 4x     |
| 304150.2   | Peru      | <i>Solanum Tuberosum</i> Gp. <i>Tuberosum</i>                                | 4x     |
| 304150.8   | Peru      | <i>Solanum Tuberosum</i> Gp. <i>Tuberosum</i>                                | 4x     |
| 304152.10  | Peru      | <i>Solanum Tuberosum</i> Gp. <i>Tuberosum</i>                                | 4x     |
| 304152.5   | Peru      | <i>Solanum Tuberosum</i> Gp. <i>Tuberosum</i>                                | 4x     |
| 304152.9LB | Peru      | <i>Solanum Tuberosum</i> Gp. <i>Tuberosum</i>                                | 4x     |
| 388615.22  | Peru      | <i>Solanum Tuberosum</i> Gp. <i>Tuberosum</i>                                | 4x     |
| 388790.24  | Peru      | <i>Solanum Tuberosum</i> Gp. <i>Tuberosum</i>                                | 4x     |
| Tacna      | Peru      | <i>Solanum Tuberosum</i> Gp. <i>Tuberosum</i>                                | 4x     |
| 391533.1   | Peru      | <i>Solanum Tuberosum</i> Gp. <i>Tuberosum</i>                                | 4x     |
| 392785.31  | Peru      | <i>Solanum Tuberosum</i> Gp. <i>Tuberosum</i>                                | 4x     |
| 392141.5   | Peru      | <i>Solanum Tuberosum</i> Gp. <i>Tuberosum</i>                                | 4x     |
| 392785.24  | Peru      | <i>Solanum Tuberosum</i> Gp. <i>Tuberosum</i>                                | 4x     |
| 393371.57  | Peru      | <i>Solanum Tuberosum</i> Gp. <i>Tuberosum</i>                                | 4x     |
| 393371.66  | Peru      | <i>Solanum Tuberosum</i> Gp. <i>Tuberosum</i>                                | 4x     |
| 393371.7   | Peru      | <i>Solanum Tuberosum</i> Gp. <i>Tuberosum</i>                                | 4x     |
| 393072.22  | Peru      | <i>Solanum Tuberosum</i> Gp. <i>Tuberosum</i>                                | 4x     |
| 393073.18  | Peru      | <i>Solanum Tuberosum</i> Gp. <i>Tuberosum</i>                                | 4x     |
| 393073.26  | Peru      | <i>Solanum Tuberosum</i> Gp. <i>Tuberosum</i>                                | 4x     |
| 393073.8   | Peru      | <i>Solanum Tuberosum</i> Gp. <i>Tuberosum</i>                                | 4x     |
| 393075.15  | Peru      | <i>Solanum Tuberosum</i> Gp. <i>Tuberosum</i>                                | 4x     |
| 393371.35  | Peru      | <i>Solanum Tuberosum</i> Gp. <i>Tuberosum</i>                                | 4x     |
| 393371.37  | Peru      | <i>Solanum Tuberosum</i> Gp. <i>Tuberosum</i>                                | 4x     |
| 393536.13  | Peru      | <i>Solanum Tuberosum</i> Gp. <i>Tuberosum</i>                                | 4x     |
| 393595.1   | Peru      | <i>Solanum Tuberosum</i> Gp. <i>Tuberosum</i>                                | 4x     |
| 395195.7   | Peru      | <i>Solanum Tuberosum</i> Gp. <i>Tuberosum</i>                                | 4x     |
| 396004.225 | Peru      | <i>Solanum Tuberosum</i> Gp. <i>Tuberosum</i>                                | 4x     |

| <b>Genotype</b> | <b>Origin</b>          | <b>Species</b>                         | <b>Ploidy</b> |
|-----------------|------------------------|----------------------------------------|---------------|
| 396026.101      | Peru                   | <i>Solanum Tuberosum</i> Gp. Tuberosum | 4x            |
| 396031.108      | Peru                   | <i>Solanum Tuberosum</i> Gp. Tuberosum | 4x            |
| 396033.102      | Peru                   | <i>Solanum Tuberosum</i> Gp. Tuberosum | 4x            |
| 396037.215      | Peru                   | <i>Solanum Tuberosum</i> Gp. Tuberosum | 4x            |
| 397077.16       | Peru                   | <i>Solanum Tuberosum</i> Gp. Tuberosum | 4x            |
| 398017.54       | Peru                   | <i>Solanum Tuberosum</i> Gp. Tuberosum | 4x            |
| 398098.119      | Peru                   | <i>Solanum Tuberosum</i> Gp. Tuberosum | 4x            |
| 399001.16       | Peru                   | <i>Solanum Tuberosum</i> Gp. Tuberosum | 4x            |
| 399049.14       | Peru                   | <i>Solanum Tuberosum</i> Gp. Tuberosum | 4x            |
| 399053.15       | Peru                   | <i>Solanum Tuberosum</i> Gp. Tuberosum | 4x            |
| 399079.28       | Peru                   | <i>Solanum Tuberosum</i> Gp. Tuberosum | 4x            |
| 399083.4        | Peru                   | <i>Solanum Tuberosum</i> Gp. Tuberosum | 4x            |
| 86060           | Peru                   | <i>Solanum Tuberosum</i> Gp. Tuberosum | 4x            |
| Granola         | Peru                   | <i>Solanum Tuberosum</i> Gp. Tuberosum | 4x            |
| 987174          | Peru                   | <i>Solanum Tuberosum</i> Gp. Tuberosum | 4x            |
| Achirana        | Argentina              | <i>Solanum Tuberosum</i> Gp. Tuberosum | 4x            |
| Agata           | Netherlands            | <i>Solanum Tuberosum</i> Gp. Tuberosum | 4x            |
| Alpha           | Netherlands            | <i>Solanum Tuberosum</i> Gp. Tuberosum | 4x            |
| Ana             | Brazil                 | <i>Solanum Tuberosum</i> Gp. Tuberosum | 4x            |
| Americana       | Bolivia                | <i>Solanum Tuberosum</i> Gp. Tuberosum | 4x            |
| Araucana        | Argentina              | <i>Solanum Tuberosum</i> Gp. Tuberosum | 4x            |
| Arazati         | Uruguay                | <i>Solanum Tuberosum</i> Gp. Tuberosum | 4x            |
| Astarte         | Netherlands            | <i>Solanum Tuberosum</i> Gp. Tuberosum | 4x            |
| Asterix         | Netherlands            | <i>Solanum Tuberosum</i> Gp. Tuberosum | 4x            |
| Atlantic        | US.                    | <i>Solanum Tuberosum</i> Gp. Tuberosum | 4x            |
| Azul            | Northwest of Argentina | <i>Solanum Tuberosum</i> Gp. Andigena  | 4x            |
| B 00.607.1      | Argentina              | <i>Solanum Tuberosum</i> Gp. Tuberosum | 4x            |
| B 01.504.2      | Argentina              | <i>Solanum Tuberosum</i> Gp. Tuberosum | 4x            |
| B 01.505.2      | Argentina              | <i>Solanum Tuberosum</i> Gp. Tuberosum | 4x            |
| B 01.559.2      | Argentina              | <i>Solanum Tuberosum</i> Gp. Tuberosum | 4x            |
| B 02.556.2      | Argentina              | <i>Solanum Tuberosum</i> Gp. Tuberosum | 4x            |
| B 03.04.505.1   | Argentina              | <i>Solanum Tuberosum</i> Gp. Tuberosum | 4x            |
| B 03.04.525.1   | Argentina              | <i>Solanum Tuberosum</i> Gp. Tuberosum | 4x            |
| B 03.04.573.1   | Argentina              | <i>Solanum Tuberosum</i> Gp. Tuberosum | 4x            |
| B 03.04.573.3   | Argentina              | <i>Solanum Tuberosum</i> Gp. Tuberosum | 4x            |
| B 03.540.2      | Argentina              | <i>Solanum Tuberosum</i> Gp. Tuberosum | 4x            |
| B 03.559.1      | Argentina              | <i>Solanum Tuberosum</i> Gp. Tuberosum | 4x            |
| B 03.559.2      | Argentina              | <i>Solanum Tuberosum</i> Gp. Tuberosum | 4x            |
| B 03.565.7      | Argentina              | <i>Solanum Tuberosum</i> Gp. Tuberosum | 4x            |
| B 03.573.1      | Argentina              | <i>Solanum Tuberosum</i> Gp. Tuberosum | 4x            |
| B 03.574.1      | Argentina              | <i>Solanum Tuberosum</i> Gp. Tuberosum | 4x            |
| B 03.574.2      | Argentina              | <i>Solanum Tuberosum</i> Gp. Tuberosum | 4x            |

| <b>Genotype</b> | <b>Origin</b> | <b>Species</b>                         | <b>Ploidy</b> |
|-----------------|---------------|----------------------------------------|---------------|
| B 03.578.1      | Argentina     | <i>Solanum Tuberosum</i> Gp. Tuberosum | 4x            |
| B 03.602.4      | Argentina     | <i>Solanum Tuberosum</i> Gp. Tuberosum | 4x            |
| B 03.620.1      | Argentina     | <i>Solanum Tuberosum</i> Gp. Tuberosum | 4x            |
| B 03.636.30 TT  | Argentina     | <i>Solanum Tuberosum</i> Gp. Tuberosum | 4x            |
| B 05.513.2      | Argentina     | <i>Solanum Tuberosum</i> Gp. Tuberosum | 4x            |
| B 06.07.640.1   | Argentina     | <i>Solanum Tuberosum</i> Gp. Tuberosum | 4x            |
| B 06.07.640.2   | Argentina     | <i>Solanum Tuberosum</i> Gp. Tuberosum | 4x            |
| B 06.07.804.2   | Argentina     | <i>Solanum Tuberosum</i> Gp. Tuberosum | 4x            |
| B 06.07.817.1   | Argentina     | <i>Solanum Tuberosum</i> Gp. Tuberosum | 4x            |
| B 06.559.1      | Argentina     | <i>Solanum Tuberosum</i> Gp. Tuberosum | 4x            |
| B 06.660.1      | Argentina     | <i>Solanum Tuberosum</i> Gp. Tuberosum | 4x            |
| B 06.07.640.6   | Argentina     | <i>Solanum Tuberosum</i> Gp. Tuberosum | 4x            |
| B 06.07.683.2   | Argentina     | <i>Solanum Tuberosum</i> Gp. Tuberosum | 4x            |
| B 06.665.1      | Argentina     | <i>Solanum Tuberosum</i> Gp. Tuberosum | 4x            |
| B 06.714.3      | Argentina     | <i>Solanum Tuberosum</i> Gp. Tuberosum | 4x            |
| B 06.785.2      | Argentina     | <i>Solanum Tuberosum</i> Gp. Tuberosum | 4x            |
| B 07.515.3      | Argentina     | <i>Solanum Tuberosum</i> Gp. Tuberosum | 4x            |
| B 07.516.1      | Argentina     | <i>Solanum Tuberosum</i> Gp. Tuberosum | 4x            |
| B 07.537.4      | Argentina     | <i>Solanum Tuberosum</i> Gp. Tuberosum | 4x            |
| B 07.573.1      | Argentina     | <i>Solanum Tuberosum</i> Gp. Tuberosum | 4x            |
| B 07.577.3      | Argentina     | <i>Solanum Tuberosum</i> Gp. Tuberosum | 4x            |
| B 07.591.2      | Argentina     | <i>Solanum Tuberosum</i> Gp. Tuberosum | 4x            |
| B 07.606.2      | Argentina     | <i>Solanum Tuberosum</i> Gp. Tuberosum | 4x            |
| B 07.606.4      | Argentina     | <i>Solanum Tuberosum</i> Gp. Tuberosum | 4x            |
| B 07.616.2      | Argentina     | <i>Solanum Tuberosum</i> Gp. Tuberosum | 4x            |
| B 07.660.1      | Argentina     | <i>Solanum Tuberosum</i> Gp. Tuberosum | 4x            |
| B 07.660.2      | Argentina     | <i>Solanum Tuberosum</i> Gp. Tuberosum | 4x            |
| B 78.502.5      | Argentina     | <i>Solanum Tuberosum</i> Gp. Tuberosum | 4x            |
| B 79.526.2      | Argentina     | <i>Solanum Tuberosum</i> Gp. Tuberosum | 4x            |
| B 79.571.1      | Argentina     | <i>Solanum Tuberosum</i> Gp. Tuberosum | 4x            |
| BT 84.527.48    | Argentina     | <i>Solanum Tuberosum</i> Gp. Tuberosum | 4x            |
| B 85.523.11     | Argentina     | <i>Solanum Tuberosum</i> Gp. Tuberosum | 4x            |
| B 85.616.3      | Argentina     | <i>Solanum Tuberosum</i> Gp. Tuberosum | 4x            |
| B 86.511.2LR    | Argentina     | <i>Solanum Tuberosum</i> Gp. Tuberosum | 4x            |
| B 86.525,1      | Argentina     | <i>Solanum Tuberosum</i> Gp. Tuberosum | 4x            |
| B 86.604.2LR    | Argentina     | <i>Solanum Tuberosum</i> Gp. Tuberosum | 4x            |
| B 87.605.2      | Argentina     | <i>Solanum Tuberosum</i> Gp. Tuberosum | 4x            |
| B 87.621.7      | Argentina     | <i>Solanum Tuberosum</i> Gp. Tuberosum | 4x            |
| B 87.823.1      | Argentina     | <i>Solanum Tuberosum</i> Gp. Tuberosum | 4x            |
| B 88.959.4      | Argentina     | <i>Solanum Tuberosum</i> Gp. Tuberosum | 4x            |
| B 90.519.2      | Argentina     | <i>Solanum Tuberosum</i> Gp. Tuberosum | 4x            |
| B 90.557.2      | Argentina     | <i>Solanum Tuberosum</i> Gp. Tuberosum | 4x            |

| <b>Genotype</b>         | <b>Origin</b>          | <b>Species</b>                         | <b>Ploidy</b> |
|-------------------------|------------------------|----------------------------------------|---------------|
| B 90.557.2              | Argentina              | <i>Solanum Tuberosum</i> Gp. Tuberosum | 4x            |
| B 90.592.1              | Argentina              | <i>Solanum Tuberosum</i> Gp. Tuberosum | 4x            |
| B 90.610.4              | Argentina              | <i>Solanum Tuberosum</i> Gp. Tuberosum | 4x            |
| B 90.619.3              | Argentina              | <i>Solanum Tuberosum</i> Gp. Tuberosum | 4x            |
| B 90.827.1              | Argentina              | <i>Solanum Tuberosum</i> Gp. Tuberosum | 4x            |
| B 91.1042.2             | Argentina              | <i>Solanum Tuberosum</i> Gp. Tuberosum | 4x            |
| B_91.717.4              | Argentina              | <i>Solanum Tuberosum</i> Gp. Tuberosum | 4x            |
| B_91.880.3              | Argentina              | <i>Solanum Tuberosum</i> Gp. Tuberosum | 4x            |
| B 91.899.6              | Argentina              | <i>Solanum Tuberosum</i> Gp. Tuberosum | 4x            |
| B 92.10.1               | Argentina              | <i>Solanum Tuberosum</i> Gp. Tuberosum | 4x            |
| B 92.647.2              | Argentina              | <i>Solanum Tuberosum</i> Gp. Tuberosum | 4x            |
| B 92.659.2              | Argentina              | <i>Solanum Tuberosum</i> Gp. Tuberosum | 4x            |
| B 92.660.5              | Argentina              | <i>Solanum Tuberosum</i> Gp. Tuberosum | 4x            |
| B 92.678.4              | Argentina              | <i>Solanum Tuberosum</i> Gp. Tuberosum | 4x            |
| B 92.868.1              | Argentina              | <i>Solanum Tuberosum</i> Gp. Tuberosum | 4x            |
| B 92.903.4              | Argentina              | <i>Solanum Tuberosum</i> Gp. Tuberosum | 4x            |
| B 93.1104.4LR           | Argentina              | <i>Solanum Tuberosum</i> Gp. Tuberosum | 4x            |
| B 93.1116.3             | Argentina              | <i>Solanum Tuberosum</i> Gp. Tuberosum | 4x            |
| B 94.96.510.5           | Argentina              | <i>Solanum Tuberosum</i> Gp. Tuberosum | 4x            |
| B 97.523.4              | Argentina              | <i>Solanum Tuberosum</i> Gp. Tuberosum | 4x            |
| B 97.617.4              | Argentina              | <i>Solanum Tuberosum</i> Gp. Tuberosum | 4x            |
| B 98.99.508.1           | Argentina              | <i>Solanum Tuberosum</i> Gp. Tuberosum | 4x            |
| B 98.99.627.2           | Argentina              | <i>Solanum Tuberosum</i> Gp. Tuberosum | 4x            |
| B 99.558.1              | Argentina              | <i>Solanum Tuberosum</i> Gp. Tuberosum | 4x            |
| Balinca                 | Northwest of Argentina | <i>Solanum Tuberosum</i> Gp. Andigena  | 4x            |
| Bannock russet          | US.                    | <i>Solanum Tuberosum</i> Gp. Tuberosum | 4x            |
| Baronesa                | Netherlands            | <i>Solanum Tuberosum</i> Gp. Tuberosum | 4x            |
| Beate                   | Norway                 | <i>Solanum Tuberosum</i> Gp. Tuberosum | 4x            |
| BGRC-41479/1 (P1)       | Argentina              | <i>Solanum chacoense</i>               | 2x            |
| BGRC-41479/15_(P15)     | Argentina              | <i>Solanum chacoense</i>               | 2x            |
| Bintje                  | Netherlands            | <i>Solanum Tuberosum</i> Gp. Tuberosum | 4x            |
| Blanca dulce            | Northwest of Argentina | <i>Solanum Tuberosum</i> Gp. Andigena  | 4x            |
| Bonaerense La Ballenera | Argentina              | <i>Solanum Tuberosum</i> Gp. Tuberosum |               |
| BT 84.529.5             | Argentina              | <i>Solanum Tuberosum</i> Gp. Tuberosum | 4x            |
| BT 84.530.28            | Argentina              | <i>Solanum Tuberosum</i> Gp. Tuberosum | 4x            |
| BT 85.520.117           | Argentina              | <i>Solanum Tuberosum</i> Gp. Tuberosum | 4x            |
| Calén INTA              | Argentina              | <i>Solanum Tuberosum</i> Gp. Tuberosum | 4x            |
| Chacay INTA             | Argentina              | <i>Solanum Tuberosum</i> Gp. Tuberosum | 4x            |
| Chieftain               | US.                    | <i>Solanum Tuberosum</i> Gp. Tuberosum | 4x            |
| Collareja               | Northwest of Argentina | <i>Solanum Tuberosum</i> Gp. Andigena  | 4x            |
| Collareja de Jujuy      | Northwest of Argentina | <i>Solanum Tuberosum</i> Gp. Andigena  | 4x            |

| <b>Genotype</b> | <b>Origin</b>          | <b>Species</b>                         | <b>Ploidy</b> |
|-----------------|------------------------|----------------------------------------|---------------|
| Coloradita      | Northwest of Argentina | <i>Solanum Tuberosum</i> Gp. Andigena  | 4x            |
| Cuarentona      | Northwest of Argentina | <i>Solanum Tuberosum</i> Gp. Andigena  | 4x            |
| Daekwar.48      | Korea                  | <i>Solanum Tuberosum</i> Gp. Tuberosum | 4x            |
| E_86.011        | Peru                   | <i>Solanum Tuberosum</i> Gp. Tuberosum | 4x            |
| Eldorado        | UK                     | <i>Solanum Tuberosum</i> Gp. Tuberosum | 4x            |
| Eurostar        | Netherlands            | <i>Solanum Tuberosum</i> Gp. Tuberosum | 4x            |
| Feiwu           | China                  | <i>Solanum Tuberosum</i> Gp. Tuberosum | 4x            |
| Fenchuixue      | China                  | <i>Solanum Tuberosum</i> Gp. Tuberosum | 4x            |
| FL 1879         | US.                    | <i>Solanum Tuberosum</i> Gp. Tuberosum | 4x            |
| Fontane         | Netherlands            | <i>Solanum Tuberosum</i> Gp. Tuberosum | 4x            |
| Frital INTA     | Argentina              | <i>Solanum Tuberosum</i> Gp. Tuberosum | 4x            |
| Gem Russet      | US.                    | <i>Solanum Tuberosum</i> Gp. Tuberosum | 4x            |
| Huinkul         | Argentina              | <i>Solanum Tuberosum</i> Gp. Tuberosum | 4x            |
| Innovator       | Netherlands            | <i>Solanum Tuberosum</i> Gp. Tuberosum | 4x            |
| Iporá           | Uruguay                | <i>Solanum Tuberosum</i> Gp. Tuberosum | 4x            |
| Jopung          | Korea                  | <i>Solanum Tuberosum</i> Gp. Tuberosum | 4x            |
| Kantara         | Netherlands            | <i>Solanum Tuberosum</i> Gp. Tuberosum | 4x            |
| Kardal          | Netherlands            | <i>Solanum Tuberosum</i> Gp. Tuberosum | 4x            |
| Karu            | Chile                  | <i>Solanum Tuberosum</i> Gp. Tuberosum | 4x            |
| Keluné          | Argentina              | <i>Solanum Tuberosum</i> Gp. Tuberosum | 4x            |
| Kennebec        | US.                    | <i>Solanum Tuberosum</i> Gp. Tuberosum | 4x            |
| Kexin           | China                  | <i>Solanum Tuberosum</i> Gp. Tuberosum | 4x            |
| La Florida      | Argentina              | <i>Solanum Tuberosum</i> Gp. Tuberosum | 4x            |
| M. roja         | -                      | <i>Solanum Tuberosum</i> Gp. Tuberosum | 4x            |
| Monalisa        | Netherlands            | <i>Solanum Tuberosum</i> Gp. Tuberosum | 4x            |
| Morada Morada   | Northwest of Argentina | <i>Solanum Tuberosum</i> Gp. Tuberosum | 4x            |
| Moradita        | Northwest of Argentina | <i>Solanum Tuberosum</i> Gp. Tuberosum | 4x            |
| Newen INTA      | Argentina              | <i>Solanum Tuberosum</i> Gp. Tuberosum | 4x            |
| Nicola          | Germany                | <i>Solanum Tuberosum</i> Gp. Tuberosum | 4x            |
| OCL 7383.7      | Northwest of Argentina | <i>Solanum tarijense</i>               | 2x            |
| OCL 7383.12     | Northwest of Argentina | <i>Solanum tarijense</i>               |               |
| Oka 5632.11     | Northwest of Argentina | <i>Solanum tarijense</i>               |               |
| Oka 5880.22     | Northwest of Argentina | <i>Solanum tarijense</i>               |               |
| Ona INIA        | Chile                  | <i>Solanum Tuberosum</i> Gp. Tuberosum | 4x            |
| Overa 213       | Northwest of Argentina | <i>Solanum Tuberosum</i> Gp. Andigena  | 4x            |
| Pampeana INTA   | Argentina              | <i>Solanum Tuberosum</i> Gp. Tuberosum | 4x            |
| Pehuenche       | Chile                  | <i>Solanum Tuberosum</i> Gp. Tuberosum | 4x            |
| Pentland Crown  | UK                     | <i>Solanum Tuberosum</i> Gp. Tuberosum | 4x            |
| Pintada         | Northwest of Argentina | <i>Solanum Tuberosum</i> Gp. Andigena  | 4x            |

| <b>Genotype</b> | <b>Origin</b>          | <b>Species</b>                         | <b>Ploidy</b> |
|-----------------|------------------------|----------------------------------------|---------------|
| PO 97.11.10     | Argentina              | <i>Solanum Tuberosum</i> Gp. Tuberosum | 4x            |
| PO 97.11.9      | Argentina              | <i>Solanum Tuberosum</i> Gp. Tuberosum | 4x            |
| PO 99.26.1      | Argentina              | <i>Solanum Tuberosum</i> Gp. Tuberosum | 4x            |
| Poluya          | Bolivia                | <i>Solanum stenotomum</i>              | 2x            |
| Primicia        | Argentina              | <i>Solanum Tuberosum</i> Gp. Tuberosum | 4x            |
| Pukará          | Chile                  | <i>Solanum Tuberosum</i> Gp. Tuberosum | 4x            |
| Puren           | Chile                  | <i>Solanum Tuberosum</i> Gp. Tuberosum | 4x            |
| Purple Majesty  | US.                    | <i>Solanum Tuberosum</i> Gp. Tuberosum | 4x            |
| Ramos           | Netherlands            | <i>Solanum Tuberosum</i> Gp. Tuberosum | 4x            |
| Ranger Russet   | US.                    | <i>Solanum Tuberosum</i> Gp. Tuberosum | 4x            |
| Revolución      | Perú                   | <i>Solanum Tuberosum</i> Gp. Tuberosum | 4x            |
| Rosada          | Northwest of Argentina | <i>Solanum Tuberosum</i> Gp. Andigena  | 4x            |
| Russet Burbank  | US                     | <i>Solanum Tuberosum</i> Gp. Tuberosum | 4x            |
| RZ 90.44.3      | Netherlands            | <i>Solanum Tuberosum</i> Gp. Tuberosum | 4x            |
| Sani            | Northwest of Argentina | <i>Solanum Tuberosum</i> Gp. Andigena  | 4x            |
| Shepody         | Canada                 | <i>Solanum Tuberosum</i> Gp. Tuberosum | 4x            |
| Sierra volcán   | Argentina              | <i>Solanum Tuberosum</i> Gp. Tuberosum | 4x            |
| Snowden         | US.                    | <i>Solanum Tuberosum</i> Gp. Tuberosum | 4x            |
| Spunta          | Netherlands            | <i>Solanum Tuberosum</i> Gp. Tuberosum | 4x            |
| Tuni blanca 105 | Northwest of Argentina | <i>Solanum Tuberosum</i> Gp. Andigena  | 4x            |
| Umatilla        | US.                    | <i>Solanum Tuberosum</i> Gp. Tuberosum | 4x            |
| Unknown         | .                      | <i>Solanum Tuberosum</i> Gp. Tuberosum | 4x            |
| Yaguarí         | Uruguay                | <i>Solanum Tuberosum</i> Gp. Tuberosum | 4x            |
| Yagana          | Chile                  | <i>Solanum Tuberosum</i> Gp. Tuberosum | 4x            |
