# Supplementary material for: Discriminant analysis of principal components and pedigree assessment of genetic diversity and population structure in a tetraploid potato panel using SNPs
Source: PubMed Central journal article supplement (PMC5856401; doi:10.1371/journal.pone.0194398), 2018-03-16
Supplement: pone.0194398.s004.pdf [file pone.0194398.s004.pdf]

S2 Table. Clusters formed by DAPC analysis

| Subpopulation 1 |                   |                               | Subpopulation 2     |                     |                |               |                | Subpop. 3          | Subpop. 4     | Subpop. 5               |
|-----------------|-------------------|-------------------------------|---------------------|---------------------|----------------|---------------|----------------|--------------------|---------------|-------------------------|
| 21 mat          | B 88.959.4        | B 90.610.4                    | 304056.4            | 396037.215          | B 92.10.1      | Poluya        | M. roja        | 399001.16          | 396004.225    | 393075.15               |
| 29 mat          | B 90.519.2        | Bonaerense<br>La<br>Ballenera | 304072.6LB          | 397077.16           | B 92.660.5     | Pukará        | Oka 5880.22    | 399049.14          | B 00.607.1    | BGRC-41479/1<br>(P1)    |
| 304013.11       | B 90.557.2        | BT<br>84.527.48               | 304079.9            | 398017.54           | B 92.868.1     | Puren         | Purple Majesty | 399053.15          | B 01.504.2    | OCL 7383.7              |
| 304013.18       | B 90.557.2        | BT<br>84.530.28               | 304081.2            | 398098119           | B 93.1104.4LR  | Ramos         | Revolución     | Balinca            | B 03.04.573.1 | Pera o Señorita         |
| 304085.1        | B 90.619.3        | Sierra<br>Volcán              | 304141.4            | 399079.28           | B 93.1116.3    | Ranger Russet | Rosada         | Blanca dulce       | B 03.559.1    | BGRC-<br>41479/15 (P15) |
| 304092.1        | B 90.827.1        |                               | 304146.1            | 399083.4            | B 94.96.510.5  | RZ 90.44.3    | Yaguarí        | Collareja          | B 03.573.1    | OCL 7383.122            |
| 392785.31       | B 91.717.4        |                               | 304149.15           | 800959<br>(Granola) | B 97.523.4     | Snowden       |                | Collareja de Jujuy | B 03.574.1    | Oka 5632.112            |
| 393371.35       | B 91.880.3        |                               | 304150.11           | 987174              | B 97.617.4     | Spunta        |                | Cuarentona         | B 03.574.2    |                         |
| Araucana        | B 92.647.2        |                               | 304150.2            | Achirana            | B 99.558.1     | Umatilla      |                | Morada Morada      | B 07.577.3    |                         |
| B 01.559.2      | B 92.659.2        |                               | 304150.8            | Agata               | Bannock russet | Unknown       |                | Moradita           | Innovator     |                         |
| B 02.556.2      | B 92.903.4        |                               | 304152.10           | Alpha               | BT 84.529.5    | Yagana        |                | Overa              | PO 97.11.10   |                         |
| B 03.540.2      | B 98.99.508.1     |                               | 304152.5            | Ana                 | Chieftain      | 393595.1      |                | Sani               | PO 97.11.9    |                         |
| B 03.578.1      | B 98.99.627.2     |                               | 304152.9 LB         | Astarte             | Feiwu          | 395195.7      |                | Tuni blanca 105    | B 03.04.573.3 |                         |
| B 03.636.30TT   | BT 85.520.117     |                               | 388615.22           | Asterix             | Fenchuixue     | 396033102     |                | Azul               | B 07.606.2    |                         |
| B 05.513.2      | Calen INTA        |                               | 388790.24           | B 03.04.505.1       | FL 1879        | 86060         |                | Moradita           | Eurostar      |                         |
| B 06.07.640.1   | Chacay Inta       |                               | 390478.9<br>(Tacna) | B 03.559.2          | Frital         | Americana     |                | Pintada            | PO 99.26.1    |                         |
| B 06.07.640.2   | Daekwar.48        |                               | 391533.1            | B 03.565.7          | Gem Russet     | Arazati       |                |                    | Shepody       |                         |
| B 06.07.804.2   | E 86.011          |                               | 392141.5            | B 07.515.3          | Iporá          | Atlantic      |                |                    |               |                         |
| B 06.07.817.1   | Fontane           |                               | 392785.24           | B 07.516.1          | Kantara        | B 03.04.525.1 |                |                    |               |                         |
| B 06.660.1      | Huinkul           |                               | 393371.57           | B 07.616.2          | Kardal         | B 03.620.1    |                |                    |               |                         |
| B 06.665.1      | Kennebec          |                               | 393371.66           | B 07.660.1          | Karu           | B 79.526.2    |                |                    |               |                         |
| B 06.714.3      | Pampeana          |                               | 393371.7            | B 07.660.2          | Kelun          | B 85.523.11   |                |                    |               |                         |
| B 06.785.2      | Primicia          |                               | 393072.22           | B 79.571.1          | Kexin          | B 92.678.4    |                |                    |               |                         |
| B 07.537.4      | Russet<br>Burbank |                               | 393073.18           | B 85.616.3          | La Florida     | Baronesa      |                |                    |               |                         |
| B 07.591.2      | B 01.505.2        |                               | 393073.26           | B 86.525.1          | Monalisa       | Beate         |                |                    |               |                         |
| B 07.606.4      | B 03.602.4        |                               | 393073.8            | B 86.604.2LR        | Newen          | Bintje        |                |                    |               |                         |
| B 78.502.5      | B 06.07.640.6     |                               | 393371.37           | B 87.605.2          | Nicola         | BT 84.529.5   |                |                    |               |                         |
| B 86.511.2LR    | B 06.07.683.2     |                               | 393536.13           | B 90.592.1          | Ona            | Coloradita    |                |                    |               |                         |
| B 87.621.7      | B 06.559.1        |                               | 396026.101          | B 91.1042.2         | Pehuenche      | Eldorado      |                |                    |               |                         |
| B 87.823.1      | B 07.573.1        |                               | 396031.108          | B 91.899.6          | Pentland Crown | Jopung        |                |                    |               |                         |
