# Supplementary material for: Discriminant analysis of principal components and pedigree assessment of genetic diversity and population structure in a tetraploid potato panel using SNPs
Source: PubMed Central journal article supplement (PMC5856401; doi:10.1371/journal.pone.0194398), 2018-03-16
Supplement: pone.0194398.s005.pdf [file pone.0194398.s005.pdf]

S4 Table. Subgroups of genotypes resulting from the DAPC analysis for subpopulations 1 and 2.

| Subpopulation 1         |               |                | Subpopulation 2 |                  |                  |
|-------------------------|---------------|----------------|-----------------|------------------|------------------|
| Subgroup 1.1            | Subgroup 1.2  | Subgroup 1.3   | Subgroup 2.1    | Subgroup 2.2     | Subgroup 2.3     |
| 304013.11               | 304013.18     | 21 mat         | 304056.4        | 304141.4         | 304072.6LB       |
| B 01.559.2              | 304092.1      | 29 mat         | 304079.9        | 304146.1         | 304150.11        |
| B 03.636.30 TT          | 392785.31     | 304085.1       | 304081.2        | 304152.5         | 304150.8         |
| B 05.513.2              | 393371.35     | Araucana       | 304149.15       | 388615.22        | 304152.10        |
| B 06.07. 640.1          | Pampeana INTA | B 02.556.2     | 304150.2        | 388790.24        | 393073.18        |
| B 06.07.640.2           |               | B 03.540.2     | 304152.9 LB     | 390478.9 (Tacna) | 399079.28        |
| B 06.07.817.1           |               | B 03.578.1     | 391533.1        | 392141.5         | 800959 (Granola) |
| B 06.660.1              |               | B 06.07.804.2  | 392785.24       | 399083.4         | Achirana         |
| B 06.665.1              |               | B 06.714.3     | 393371.57       | 987174           | Agata            |
| B 07.537.4              |               | B 06.785.2     | 393371.66       | B 03.559.2       | Alpha            |
| B 07.591.2              |               | B 87.621.7     | 393371.7        | B 07.515.3       | Ana              |
| B 07.606.4              |               | B 87.823.1     | 393072.22       | B 07.516.1       | Asterix          |
| B 78.502.5              |               | B 88.959.4     | 393073.26       | B 07.616.2       | B 03.04.505.1    |
| B 86.511.2LR            |               | B 90.519.2     | 393073.8        | B 07.660.1       | B 03.565.7       |
| B 90.557.2              |               | B 90.619.3     | 393371.37       | B 07.660.2       | B 79.571.1       |
| B 90.557.2              |               | B 91.717.4     | 393536.13       | B 86.525,1       | B 85.616.3       |
| B 90.827.1              |               | B 91.880.3     | 396026.101      | B 90.592.1       | B 86.604.2LR     |
| B 92.647.2              |               | B 92.659.2     | 396031.108      | B 91.1042.2      | B 87.605.2       |
| B 98.99.508.1           |               | B 92.903.4     | 396037.215      | B 91.899.6       | B 92.10.1        |
| B 98.99.627.2           |               | Calén INTA     | 397077.16       | B 92.868.1       | B 92.660.5       |
| BT 85.520.117           |               | Chacay INTA    | 398017.54       | B 93.1116.3      | Feiwu            |
| Huinkul                 |               | Daekwar.48     | 398098.119      | B 97.523.4       | Fenchuixue       |
| Kennebec                |               | E 86.011       | Astarte         | B 97.617.4       | Kardal           |
| Primicia                |               | Fontane        | B 93.1104.4LR   | B 99.558.1       | Karu             |
| B 01.505.2              |               | Russet Burbank | B 94.96.510.5   | Bannock russet   | Keluné           |
| B 06.07.640.6           |               | B 03.602.4     | BT 84.529.5     | Chieftain        | La Florida       |
| B 06.07.683.2           |               | B 07.573.1     | Iporá           | FL 1879          | Monalisa         |
| B 06.559.1              |               | B 90.610.4     | Spunta          | Frital           | Nicola           |
| Bonaerense La Ballenera |               | BT 84.527.48   | Unknown         | Gem Russet       | Ona INIA         |
| Sierra Volcán           |               | BT 84.530.28   | 396033.102      | Kantara          | Pehuenche        |
|                         |               |                | 86060           | Kexin            | Pentland Crown   |
|                         |               |                | Oka 5880.22     | Newen            | Poluya           |
|                         |               |                | Revolución      | Puren            | Pukará           |
|                         |               |                |                 | Ranger Russet    | Ramos            |
|                         |               |                |                 | RZ 90.44.3       | Yagana           |
|                         |               |                |                 | Snowden          | B 79.526.2       |
|                         |               |                |                 | Umatilla         | B 85.523.11      |
|                         |               |                |                 | 393595.1         | B 92.678.4       |
|                         |               |                |                 | 395195.7         | Baronesa         |
|                         |               |                |                 | Americana        | Beate            |
|                         |               |                |                 | Arazati          | Bintje           |
|                         |               |                |                 | Atlantic         | Coloradita       |
|                         |               |                |                 | B 03.04.525.1    | Eldorado         |
|                         |               |                |                 | B 03.620.1       | Rosada           |
|                         |               |                |                 | Jopung           |                  |
|                         |               |                |                 | M. roja          |                  |
|                         |               |                |                 | Purple Majesty   |                  |
|                         |               |                |                 | Yaguari          |                  |
