# Supplementary material for: Discriminant analysis of principal components and pedigree assessment of genetic diversity and population structure in a tetraploid potato panel using SNPs
Source: PubMed Central journal article supplement (PMC5856401; doi:10.1371/journal.pone.0194398), 2018-03-16
Supplement: pone.0194398.s006.pdf [file pone.0194398.s006.pdf]

S6 Table. Structural SNPs identified by SNPZIP analysis. Annotations were obtained from the Potato Genome database and associated functions were obtained from Gene Ontology (GO) database

| SNP id              | Chr | LD | Contribution | Annotation                                                 | Gene ontology annotations                                        |
|---------------------|-----|----|--------------|------------------------------------------------------------|------------------------------------------------------------------|
| solcap_snp_c2_16299 | 12  | 1  | 0.004371293  | Acyl-CoA thioesterase                                      | Hydrolysis of acyl-CoAs                                          |
| solcap_snp_c2_31600 | 6   |    | 0.006005380  | Conserved gene of unknown function                         |                                                                  |
| solcap_snp_c1_14248 | 1   | 2  | 0.002476263  | Calmodulin-binding transcription activator (Camta), plants | Transcription factor                                             |
| solcap_snp_c1_22    | 1   |    | 0.003083547  | Gene of unknown function                                   |                                                                  |
| solcap_snp_c1_3436  | 4   |    | 0.003365768  | Ubiquinone biosynthesis protein coq-8                      | Ubiquinone biosynthetic process                                  |
| solcap_snp_c1_3497  | 4   |    | 0.002568070  | Gene of unknown function                                   |                                                                  |
| solcap_snp_c1_7227  | 10  |    | 0.003163455  | Gene of unknown function                                   |                                                                  |
| solcap_snp_c2_23337 | 12  |    | 0.003222444  | Ethylene-responsive element binding protein                | Regulation of transcription, DNA-templated                       |
| solcap_snp_c2_27765 | 9   |    | 0.004587061  | Sucrose synthase                                           | Carbohydrate metabolism                                          |
| solcap_snp_c2_28761 | 10  |    | 0.002698637  | Gene of unknown function                                   |                                                                  |
| solcap_snp_c2_30950 | 2   |    | 0.002465777  | Zinc finger protein                                        | Transcription factor                                             |
| solcap_snp_c2_31358 | 4   |    | 0.004142081  | Calcium dependent protein kinase                           | Protein phosphorylation, defense response                        |
| solcap_snp_c2_31360 | 4   |    | 0.003550113  | Calcium dependent protein kinase                           | Protein phosphorylation, defense response                        |
| solcap_snp_c2_31600 | 6   |    | 0.004857531  | Conserved gene of unknown function                         |                                                                  |
| solcap_snp_c2_34197 | 11  |    | 0.002453164  | Protein kinase                                             | Protein phosphorylation                                          |
| solcap_snp_c2_38246 | 4   |    | 0.002452655  | Gene of unknown function                                   |                                                                  |
| solcap_snp_c2_41906 | 2   |    | 0.002608736  | Zinc/iron transporter                                      | Metal ion transmembrane transporter                              |
| solcap_snp_c2_46707 | 7   |    | 0.002866617  | 4-cumarate-COA-ligase                                      | Catalytic activity, defense response                             |
| solcap_snp_c2_46710 | 7   |    | 0.002909402  | AMP dependent CoA ligase                                   | Catalytic activity, defense response                             |
| solcap_snp_c2_46715 | 7   |    | 0.002948732  | Porin/voltage-dependent anion-selective channel protein    | ATPase activity, coupled to transmembrane movement of substances |
| solcap_snp_c2_47510 | 3   |    | 0.002903629  | Component of high affinity nitrate transporter             | Nitrate transport                                                |
| solcap_snp_c2_48715 | 7   |    | 0.002840265  | Purine permease 3                                          | Transporter activity                                             |
| solcap_snp_c2_49068 | 2   |    | 0.002911321  | Metalloprotease m41 fth                                    | Microtubule-severing ATPase activity                             |
| solcap_snp_c2_51559 | 4   |    | 0.002673901  | Lycopene beta cyclase, chloroplastic                       | Carotenoid biosynthetic process                                  |
| solcap_snp_c2_52663 | 7   |    | 0.002630232  | Acetyltransferase                                          | N-acetyltransferase activity                                     |
| solcap_snp_c2_54069 | 0   |    | 0.003111650  | Sn-1 protein                                               | Defense response                                                 |
