# Supplementary material for: Discriminant analysis of principal components and pedigree assessment of genetic diversity and population structure in a tetraploid potato panel using SNPs
Source: PubMed Central journal article supplement (PMC5856401; doi:10.1371/journal.pone.0194398), 2018-03-16
Supplement: pone.0194398.s007.pdf [file pone.0194398.s007.pdf]

S7 Table. Structural SNPs identified by SNPZIP analysis, into Subpopulations 1 and 2. Annotations were obtained from the Potato Genome database and associated functions were obtained from Gene Ontology (GO) database

| Pop                 | SNP id              | Chr         | DA                                           | Contribution                                 | Annotation                                                                        | Gene ontology annotations                                                                                    |
|---------------------|---------------------|-------------|----------------------------------------------|----------------------------------------------|-----------------------------------------------------------------------------------|--------------------------------------------------------------------------------------------------------------|
| 1                   | solcap_snp_c1_11750 | 4           | 1                                            | 0.002323946                                  | Fructose-1,6-bisphosphatase, cytosolic                                            | Carbohydrate metabolic process<br>Transcription factor activity, sequence-specific DNA binding               |
|                     | solcap_snp_c1_12899 | 11          |                                              | 0.002512040                                  | PHAP2A protein                                                                    | Protein phosphorylation, defense reactions                                                                   |
|                     | solcap_snp_c1_13530 | 10          |                                              | 0.002877826                                  | Calcium-dependent protein kinase 4                                                | Protein phosphorylation, defense reactions                                                                   |
|                     | solcap_snp_c1_13531 | 10          |                                              | 0.003255512                                  | Calcium-dependent protein kinase 4                                                | ATP-dependent RNA helicase                                                                                   |
|                     | solcap_snp_c2_11313 | 6           |                                              | 0.002266546                                  | ATP-dependent helicase<br>SPX (SYG1/Pho81/XPR1) domain-containing protein         | ATPase activity, coupled to transmembrane movement of substances                                             |
|                     | solcap_snp_c2_12106 | 1           |                                              | 0.003089240                                  | Tetratricopeptide repeat (TPR)-containing protein                                 | Regulation of different cellular functions<br>Regulation of transcription, auxin-activated signaling pathway |
|                     | solcap_snp_c2_12252 | 11          |                                              | 0.002582589                                  | Auxin response factor                                                             | Thiamine biosynthetic process                                                                                |
|                     | solcap_snp_c2_15331 | 11          |                                              | 0.002983387                                  | Thiamine biosynthesis protein ThiC variant L1                                     | Conserved gene of unknown function                                                                           |
|                     | solcap_snp_c2_27571 | 6           |                                              | 0.002253724                                  | Conserved gene of unknown function                                                | Conserved gene of unknown function                                                                           |
|                     | solcap_snp_c2_27773 | 12          |                                              | 0.003012334                                  | Conserved gene of unknown function                                                | Mitochondrial inner membrane                                                                                 |
|                     | solcap_snp_c2_27831 | 10          |                                              | 0.002353000                                  | Conserved gene of unknown function                                                | Carotenoid biosynthetic pathway                                                                              |
|                     | solcap_snp_c2_32359 | 1           |                                              | 0.002401549                                  | Conserved gene of unknown function                                                | Carbohydrate metabolic process                                                                               |
|                     | solcap_snp_c2_32954 | 11          |                                              | 0.002655819                                  | Mitochondrial prohibitin 1<br>Phytoene dehydrogenase, chloroplastic/chromoplastic | Phenylpropanoid metabolism                                                                                   |
|                     | solcap_snp_c2_37119 | 3           |                                              | 0.002395287                                  | Fructose-1,6-bisphosphatase, cytosolic                                            | Signaling and plant defense                                                                                  |
|                     | solcap_snp_c2_39801 | 4           |                                              | 0.002368024                                  | Conserved gene of unknown function                                                | Pectin methylesterase 1                                                                                      |
|                     | solcap_snp_c2_4225  | 11          |                                              | 0.002827223                                  | Conserved gene of unknown function                                                | F-box protein SKIP14                                                                                         |
|                     | solcap_snp_c2_53946 | 10          |                                              | 0.002335623                                  | Phenylalanine ammonia-lyase 1<br>Serine-threonine protein kinase, plant-type      | Protein ubiquitination                                                                                       |
|                     | solcap_snp_c2_54932 | 10          |                                              | 0.002315496                                  | Conserved gene of unknown function                                                | Protease                                                                                                     |
|                     | solcap_snp_c2_55279 | 3           |                                              | 0.003206189                                  | Pectin methylesterase 1                                                           |                                                                                                              |
|                     | solcap_snp_c1_10941 | 4           |                                              | 0.003623051                                  | F-box protein SKIP14                                                              |                                                                                                              |
| solcap_snp_c1_12887 | 4                   | 0.003529604 | Conserved gene of unknown function           |                                              |                                                                                   |                                                                                                              |
| solcap_snp_c1_16261 | 4                   | 0.004247470 | Sentrin/sumo-specific protease               |                                              |                                                                                   |                                                                                                              |
| solcap_snp_c2_51372 | 8                   | 0.003273088 | Gene of unknown function                     |                                              |                                                                                   |                                                                                                              |
| 2                   | solcap_snp_c1_13641 | 6           | 1                                            | 0.002547742                                  | WERBP-1 protein                                                                   | Regulation of transcription, DNA-templated                                                                   |
|                     | solcap_snp_c1_1535  | 0           |                                              | 0.004301551                                  | Calcium-dependent protein kinase                                                  | Protein phosphorylation, defense response                                                                    |
|                     | solcap_snp_c1_2065  | 6           |                                              | 0.002478365                                  | Phosphate abc transporter                                                         | Transport                                                                                                    |
|                     | solcap_snp_c1_7148  | 10          |                                              | 0.002732923                                  | RBP50                                                                             | mRNA processing                                                                                              |
|                     | solcap_snp_c1_7187  | 10          |                                              | 0.002582318                                  | RING finger                                                                       | Protein ubiquitination                                                                                       |
|                     | solcap_snp_c1_7192  | 10          |                                              | 0.003123266                                  | Actin                                                                             | Nucleotide binding                                                                                           |
|                     | solcap_snp_c1_7520  | 7           |                                              | 0.002433071                                  | Rhamnose:beta-solanine/beta-chaconine rhamnosyltransferase                        | Transferase activity                                                                                         |
|                     | solcap_snp_c2_17592 | 1           |                                              | 0.002511684                                  | Conserved gene of unknown function                                                |                                                                                                              |
|                     | solcap_snp_c2_24297 | 6           |                                              | 0.002499110                                  | Conserved gene of unknown function                                                |                                                                                                              |
|                     | solcap_snp_c2_29745 | 10          |                                              | 0.002775460                                  | Transferase, transferring glycosyl groups                                         | Galactosyltransferase activity                                                                               |
|                     | solcap_snp_c2_45770 | 8           |                                              | 0.002445928                                  | Catalytic                                                                         | Catalytic activity                                                                                           |
|                     | solcap_snp_c2_46398 | 7           |                                              | 0.002588965                                  | Protein kinase APK1B, chloroplast                                                 | Protein phosphorylation                                                                                      |
|                     | solcap_snp_c2_54353 | 1           |                                              | 0.002977316                                  | DNA polymerase eta                                                                | DNA repair                                                                                                   |
|                     | solcap_snp_c2_55831 | 7           |                                              | 0.003099008                                  | Sucrose-phosphate-synthase                                                        | Sucrose biosynthetic process                                                                                 |
|                     | solcap_snp_c2_5864  | 6           |                                              | 0.003113798                                  | Protein CASP                                                                      | Integral component of membrane                                                                               |
|                     | solcap_snp_c2_10409 | 5           |                                              | 0.004274992                                  | Ferritin                                                                          | Ferroxidase activity, iron ion transport                                                                     |
| solcap_snp_c2_24595 | 12                  | 0.007038564 | Gene of unknown function                     |                                              |                                                                                   |                                                                                                              |
| solcap_snp_c2_33893 | 6                   | 0.003990978 | Cytochrome c1-1, heme protein, mitochondrial | Electron carrier activity, respiratory chain |                                                                                   |                                                                                                              |
