# Supplementary material for: Discriminant analysis of principal components and pedigree assessment of genetic diversity and population structure in a tetraploid potato panel using SNPs
Source: PubMed Central journal article supplement (PMC5856401; doi:10.1371/journal.pone.0194398), 2018-03-16
Supplement: pone.0194398.s008.pdf [file pone.0194398.s008.pdf]

S8 Table. Pairwise genetic differentiation values (Fst) between subpopulations of the whole potato panel.

| <b>Subpop.</b> | <b>Subpop.</b> | <b>Fst</b> | <b>Nm</b> | <b>pvalue</b> | <b>permutations</b> |
|----------------|----------------|------------|-----------|---------------|---------------------|
| 1              | 2              | 0.023      | 10.460    | 0.000         | 9999                |
| 1              | 3              | 0.110      | 2.016     | 0.000         | 9999                |
| 2              | 3              | 0.073      | 3.180     | 0.000         | 9999                |
| 1              | 4              | 0.078      | 2.975     | 0.000         | 9999                |
| 2              | 4              | 0.054      | 4.392     | 0.000         | 9999                |
| 3              | 4              | 0.135      | 1.595     | 0.000         | 9999                |
| 1              | 5              | 0.491      | 0.259     | 0.000         | 9999                |
| 2              | 5              | 0.475      | 0.277     | 0.000         | 9999                |
| 3              | 5              | 0.567      | 0.191     | 0.000         | 9999                |
| 4              | 5              | 0.536      | 0.217     | 0.000         | 9999                |
