# Supplementary material for: Discriminant analysis of principal components and pedigree assessment of genetic diversity and population structure in a tetraploid potato panel using SNPs
Source: PubMed Central journal article supplement (PMC5856401; doi:10.1371/journal.pone.0194398), 2018-03-16
Supplement: pone.0194398.s009.pdf [file pone.0194398.s009.pdf]

S9 Table. Results of Maximum average contribution calculated among the three *S. tuberosum* Gp. Tuberosum subpopulations.

Number of ancestors: Ancestors that were considered in the genealogy of each individual of the subpopulation. Type: Maternal or paternal line. MCP: Maximum Cumulative probability: Sum of the maximum probabilities provided by the ancestor in relation to the level of the genealogy in which it occurs in each genotype of the subpopulation. FA: Frequency of appearance: of the ancestor in the individuals of the subpopulation. MAC: Maximum average contribution: MCP/FA

| Group     | Number of ancestors considered | Path     | Ancestors                             | MCP      | FA       | FA (%)      | MAC         | MAC (%)     |             |             |
|-----------|--------------------------------|----------|---------------------------------------|----------|----------|-------------|-------------|-------------|-------------|-------------|
| 1 (N=64)  | 347                            | Maternal | Serrana INTA                          | 2.9375   | 11       | 17.1875     | 0.267045455 | 26.70454545 |             |             |
|           |                                |          | MPI 59.703/21                         | 1.46875  | 11       | 17.1875     | 0.133522727 | 13.35227273 |             |             |
|           |                                |          | B 2.63                                | 1.78125  | 14       | 21.875      | 0.127232143 | 12.72321429 |             |             |
|           |                                |          | Katahdin                              | 3.03125  | 26       | 40.625      | 0.116586538 | 11.65865385 |             |             |
|           |                                |          | Huinkul                               | 2.84375  | 25       | 39.0625     | 0.11375     | 11.375      |             |             |
|           | 266                            | Paternal | Saranac                               | 2.28125  | 22       | 34.375      | 0.103693182 | 10.36931818 |             |             |
|           |                                |          | Katahdin                              | 5        | 38       | 59.375      | 0.131578947 | 13.15789474 |             |             |
|           |                                |          | Earlaine                              | 5.21875  | 31       | 48.4375     | 0.168346774 | 16.83467742 |             |             |
|           |                                |          | Saranac                               | 4.84375  | 27       | 42.1875     | 0.179398148 | 17.93981481 |             |             |
|           |                                |          | Huinkul                               | 7.9375   | 25       | 39.0625     | 0.3175      | 31.75       |             |             |
| 2 (N=128) | 517                            | Maternal | Serrana INTA                          | 4.25     | 10       | 7.8125      | 0.425       | 42.5        |             |             |
|           |                                |          | 387170.16                             | 3        | 8        | 6.25        | 0.375       | 37.5        |             |             |
|           |                                |          | MPI 59.703/21                         | 2.15625  | 11       | 8.59375     | 0.196022727 | 19.60227273 |             |             |
|           |                                |          | B 2.63                                | 2.28125  | 13       | 10.15625    | 0.175480769 | 17.54807692 |             |             |
|           |                                |          | 383300,21 (C83.119)                   | 2.125    | 13       | 10.15625    | 0.163461538 | 16.34615385 |             |             |
|           |                                |          | 575049 (CEW-69-1)                     | 1.4375   | 9        | 7.03125     | 0.159722222 | 15.97222222 |             |             |
|           |                                |          | 386614,16 (XY16)                      | 1.125    | 8        | 6.25        | 0.140625    | 14.0625     |             |             |
|           |                                |          | Huinkul                               | 2.40625  | 19       | 14.84375    | 0.126644737 | 12.66447368 |             |             |
|           |                                |          | MPI 55.957/54                         | 1.0625   | 10       | 7.8125      | 0.10625     | 10.625      |             |             |
|           |                                |          |                                       | Katahdin | 2.484375 | 42          | 32.8125     | 0.059151786 | 5.915178571 |             |
|           | 518                            | Paternal | 389746,2                              | 4.25     | 9        | 7.03125     | 0.472222222 | 47.22222222 |             |             |
|           |                                |          | Huinkul                               | 3.0625   | 9        | 7.03125     | 0.340277778 | 34.02777778 |             |             |
|           |                                |          | Desiree                               | 3.6875   | 11       | 8.59375     | 0.335227273 | 33.52272727 |             |             |
|           |                                |          | 386614,16 (XY 16)                     | 3.125    | 11       | 8.59375     | 0.284090909 | 28.40909091 |             |             |
|           |                                |          | 381379,9                              | 2.125    | 9        | 7.03125     | 0.236111111 | 23.61111111 |             |             |
|           |                                |          | Urgenta                               | 1.8125   | 9        | 7.03125     | 0.201388889 | 20.13888889 |             |             |
|           |                                |          | Depesche                              | 1.8125   | 9        | 7.03125     | 0.201388889 | 20.13888889 |             |             |
|           |                                |          | 383300,21 (C83.119)                   | 1.625    | 9        | 7.03125     | 0.180555556 | 18.05555556 |             |             |
|           |                                |          | Y84.007                               | 2.0625   | 13       | 10.15625    | 0.158653846 | 15.86538462 |             |             |
|           |                                |          | Atlantic                              | 2.0625   | 13       | 10.15625    | 0.158653846 | 15.86538462 |             |             |
|           |                                |          | Saranac                               | 1.84375  | 12       | 9.375       | 0.153645833 | 15.36458333 |             |             |
|           |                                |          | USDA 96-56                            | 1.21875  | 9        | 7.03125     | 0.135416667 | 13.54166667 |             |             |
|           |                                |          | Lenape                                | 1.9375   | 16       | 12.5        | 0.12109375  | 12.109375   |             |             |
|           |                                |          | Earlaine                              | 2.375    | 20       | 15.625      | 0.11875     | 11.875      |             |             |
|           |                                |          | 378971,928                            | 1.1875   | 11       | 8.59375     | 0.107954545 | 10.79545455 |             |             |
|           |                                |          | Preferent                             | 0.96875  | 9        | 7.03125     | 0.107638889 | 10.76388889 |             |             |
|           |                                |          | Furore                                | 1        | 10       | 7.8125      | 0.1         | 10          |             |             |
|           |                                |          |                                       |          |          | Katahdin    | 5.046875    | 52          | 40.625      | 0.097055288 |
| 4 (N=17)  |                                |          | 146                                   | Maternal | Gabriela | 0.4375      | 6           | 35.29411765 | 0.072916667 | 7.291666667 |
|           | Katahdin                       | 0.40625  |                                       |          | 6        | 35.29411765 | 0.067708333 | 6.770833333 |             |             |
|           | Saranac                        | 0.4375   |                                       |          | 7        | 41.17647059 | 0.0625      | 6.25        |             |             |
|           | USDA 96.56                     | 0.3125   |                                       |          | 6        | 35.29411765 | 0.052083333 | 5.208333333 |             |             |
|           | Earlaine                       | 0.3125   |                                       |          | 6        | 35.29411765 | 0.052083333 | 5.208333333 |             |             |
|           | CPC 1673-20 (adg) x Furore     | 0.21875  |                                       |          | 5        | 29.41176471 | 0.04375     | 4.375       |             |             |
|           | Saskia                         | 0.28125  |                                       |          | 7        | 41.17647059 | 0.040178571 | 4.017857143 |             |             |
|           | 143                            | Paternal | Innovator                             | 3.5      | 7        | 41.17647059 | 0.5         | 50          |             |             |
|           |                                |          | RZ 84-2580                            | 2.25     | 8        | 47.05882353 | 0.28125     | 28.125      |             |             |
|           |                                |          | Katahdin                              | 0.875    | 10       | 58.82352941 | 0.0875      | 8.75        |             |             |
|           |                                |          | Saskia x (CPC 1673-20 (adg) x Furore) | 0.3125   | 8        | 47.05882353 | 0.0390625   | 3.90625     |             |             |
|           |                                |          | CPC 1673-11 (adg) x Furore            | 0.03125  | 1        | 5.882352941 | 0.03125     | 3.125       |             |             |
|           |                                |          |                                       |          |          |             |             |             |             |             |
